# Supplementary material for: Time-dependent quantum dynamics study of the F + C2H6 → HF + C2H5 reaction
Source: Royal Society of Chemistry journal article supplement (doi:10.1039/d1cp04212b), 2021-01-01
Supplement: d1cp04212b1.pdf [file d1cp04212b1.pdf]

## SUPPORTING INFORMATION

### Time-dependent quantum dynamics study of the $F + C_2H_6 \rightarrow HF$

#### + $C_2H_5$ reaction

Delu Gao and Dunyou Wang\*

*College of Physics and Electronics, Shandong Normal University, Jinan 250014,  
Shandong, China*

\*Corresponding Author:

*E-mail address: [dywang@sdu.edu.cn](mailto:dywang@sdu.edu.cn)*

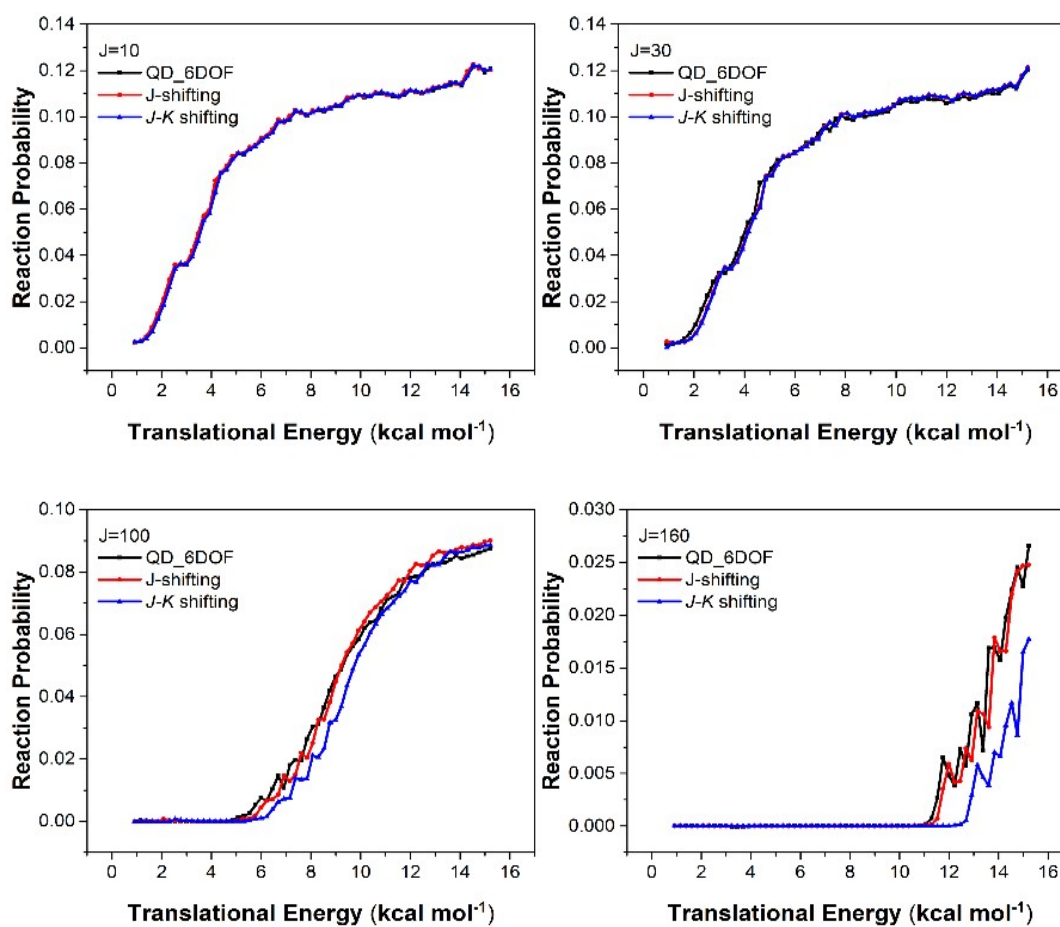

**Figure S1.** The comparison of the reaction probabilities among the quantum dynamics calculated results (black line), the standard J-shifting results, and the *J-K* shifting results for  $J=0, 30, 100,$  and  $160,$  respectively.
